# Supplementary material for: High-resolution ISR amplicon sequencing reveals personalized oral microbiome
Source: PubMed Central journal article supplement (PMC6126016; doi:10.1186/s40168-018-0535-z), 2018-09-05

# ISR Blast Matches

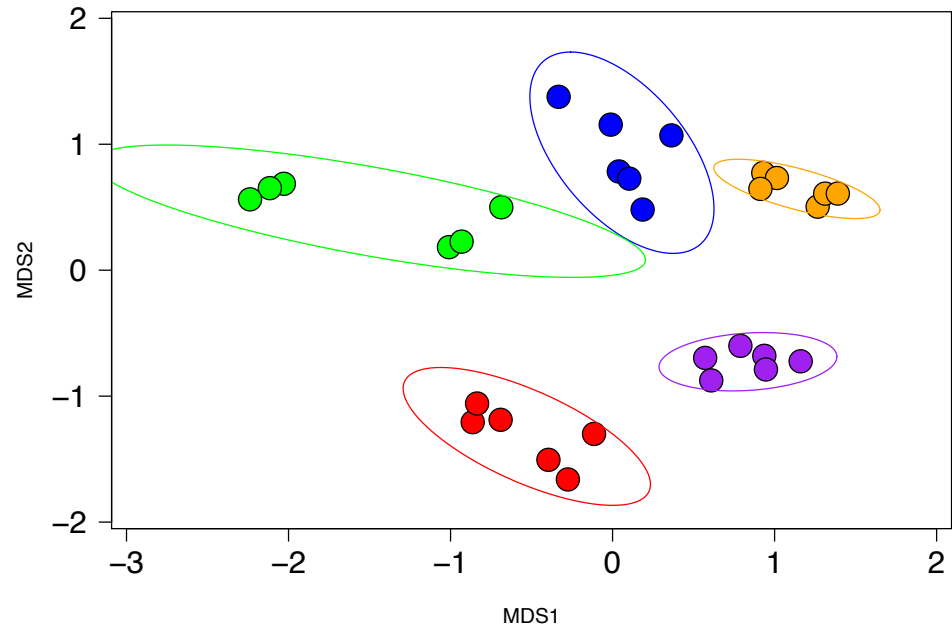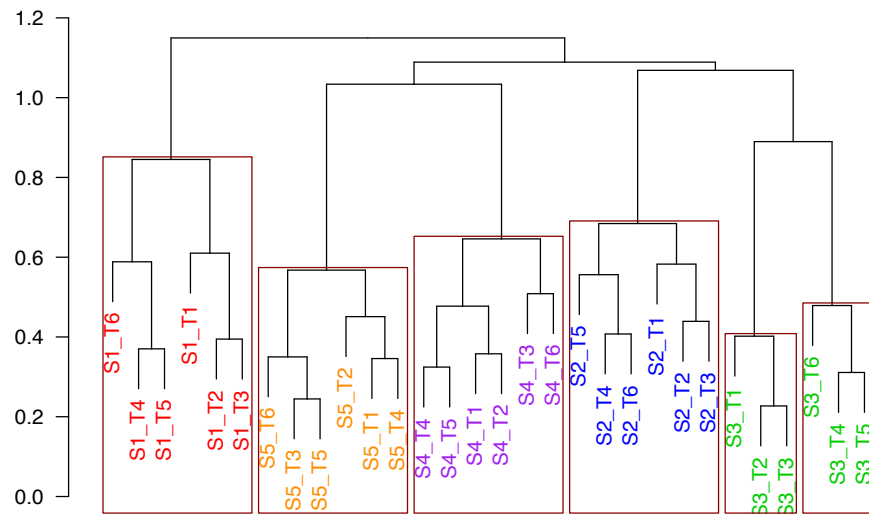

Supplement: 40168_2018_535_MOESM4_ESM.pdf [file 40168_2018_535_MOESM4_ESM.pdf]
